# Supplementary material for: Time trends in social contacts of individuals according to comorbidity and vaccination status, before and during the COVID-19 pandemic
Source: Springer Nature journal article supplement (doi:10.1186/s12916-022-02398-x), 2022-05-23
Supplement: MOESM1 [file 22767096]

## ADDITIONAL FILE 1

### Table of contents

|                                                                                                                                                                                     |    |
|-------------------------------------------------------------------------------------------------------------------------------------------------------------------------------------|----|
| Table S1. Distribution of comorbidity status among confirmed cases in Quebec adults .....                                                                                           | 2  |
| Table S2. STROBE Statement—Checklist of items that should be included in reports of cross-sectional studies ..                                                                      | 3  |
| Table S3. Classifications of active physical comorbidities .....                                                                                                                    | 5  |
| Table S4. Sample size calculations.....                                                                                                                                             | 6  |
| Table S5. Key socio-demographic characteristics of participants, by period.....                                                                                                     | 7  |
| Table S6. Time trends in the mean number of social contacts of individuals with and without active physical comorbidities .....                                                     | 9  |
| Table S7. Time trends in the mean total number of social contacts of individuals with and without active physical comorbidities at risk of COVID-19 complications .....             | 12 |
| Table S8. Vaccination coverage with one dose of individuals with and without active physical comorbidities in the third wave .....                                                  | 14 |
| Table S9. Recommended Quebec priority groups for vaccination against COVID-19.....                                                                                                  | 15 |
| Table S10. Mean total number of social contacts in the third wave of individuals with and without active physical comorbidities according to vaccination status with one dose ..... | 16 |
| Figure S1. Distribution of participants according to classifications of comorbidities.....                                                                                          | 17 |
| Figure S2. Time trends in vaccination coverage with one dose of individuals with and without active physical comorbidities in the third wave .....                                  | 18 |
| Example of questions S1. Questions on health conditions .....                                                                                                                       | 19 |
| Example of questions S2. Example of the social contact diary .....                                                                                                                  | 21 |

**Table S1. Distribution of comorbidity status among confirmed cases in Quebec adults\***

|                         | <b>1<sup>st</sup> wave</b> |      | <b>2<sup>nd</sup> wave</b> |      | <b>3<sup>rd</sup> wave</b> |      |
|-------------------------|----------------------------|------|----------------------------|------|----------------------------|------|
|                         | n                          | %    | n                          | %    | n                          | %    |
| <b>All adults</b>       |                            |      |                            |      |                            |      |
| Without comorbidities   | 19265                      | 51.2 | 94879                      | 56.6 | 29710                      | 62.3 |
| With comorbidities      | 18331                      | 48.8 | 72634                      | 43.4 | 17997                      | 37.7 |
| <b>18-45 years old</b>  |                            |      |                            |      |                            |      |
| Without comorbidities   | 12529                      | 71.0 | 64201                      | 73.6 | 20491                      | 75.3 |
| With comorbidities      | 5119                       | 29.0 | 23064                      | 26.4 | 6715                       | 24.7 |
| <b>46-65 years old</b>  |                            |      |                            |      |                            |      |
| Without comorbidities   | 6169                       | 47.3 | 27159                      | 50.3 | 8303                       | 52.9 |
| With comorbidities      | 6877                       | 52.7 | 26846                      | 49.7 | 7386                       | 47.1 |
| <b>66-75 years old</b>  |                            |      |                            |      |                            |      |
| Without comorbidities   | 416                        | 17.9 | 2609                       | 22.9 | 722                        | 25.3 |
| With comorbidities      | 1914                       | 82.1 | 8787                       | 77.1 | 2128                       | 74.7 |
| <b>&gt;75 years old</b> |                            |      |                            |      |                            |      |
| Without comorbidities   | 151                        | 3.3  | 910                        | 6.1  | 194                        | 9.9  |
| With comorbidities      | 4421                       | 96.7 | 13937                      | 93.9 | 1768                       | 90.1 |

**1<sup>st</sup> wave:** February 23<sup>rd</sup> to July 11<sup>th</sup> 2020; **2<sup>nd</sup> wave:** August 23<sup>rd</sup> 2020 to March 20<sup>th</sup> 2021; **3<sup>rd</sup> wave:** March 21<sup>st</sup> to July 13<sup>th</sup> 2021.

Methodology used to generate data from the first wave is available online [6]. The same methodology has been used for the other waves.

\* Cases from nursing homes are excluded

**Table S2. STROBE Statement—Checklist of items that should be included in reports of *cross-sectional studies* [30]**

|                              | <b>Item No</b> | <b>Recommendation</b>                                                                                                                                                                             | <b>Page No</b>         |
|------------------------------|----------------|---------------------------------------------------------------------------------------------------------------------------------------------------------------------------------------------------|------------------------|
| <b>Title and abstract</b>    | 1              | (a) Indicate the study’s design with a commonly used term in the title or the abstract                                                                                                            | 2                      |
|                              |                | (b) Provide in the abstract an informative and balanced summary of what was done and what was found                                                                                               | 2, 3                   |
| <b>Introduction</b>          |                |                                                                                                                                                                                                   |                        |
| Background/rationale         | 2              | Explain the scientific background and rationale for the investigation being reported                                                                                                              | 4, 5                   |
| Objectives                   | 3              | State specific objectives, including any prespecified hypotheses                                                                                                                                  | 5, 6                   |
| <b>Methods</b>               |                |                                                                                                                                                                                                   |                        |
| Study design                 | 4              | Present key elements of study design early in the paper                                                                                                                                           | 6                      |
| Setting                      | 5              | Describe the setting, locations, and relevant dates, including periods of recruitment, exposure, follow-up, and data collection                                                                   | 6, 7, 8, 9<br>Figure 1 |
| Participants                 | 6              | (a) Give the eligibility criteria, and the sources and methods of selection of participants                                                                                                       | 6                      |
| Variables                    | 7              | Clearly define all outcomes, exposures, predictors, potential confounders, and effect modifiers. Give diagnostic criteria, if applicable                                                          | 7, 8, 9, 10            |
| Data sources/<br>measurement | 8*             | For each variable of interest, give sources of data and details of methods of assessment (measurement). Describe comparability of assessment methods if there is more than one group              | 7, 8, 9                |
| Bias                         | 9              | Describe any efforts to address potential sources of bias                                                                                                                                         | 9, 10                  |
| Study size                   | 10             | Explain how the study size was arrived at                                                                                                                                                         | 10                     |
| Quantitative variables       | 11             | Explain how quantitative variables were handled in the analyses. If applicable, describe which groupings were chosen and why                                                                      | 9, 10                  |
| Statistical methods          | 12             | (a) Describe all statistical methods, including those used to control for confounding                                                                                                             | 9, 10                  |
|                              |                | (b) Describe any methods used to examine subgroups and interactions                                                                                                                               | 9, 10                  |
|                              |                | (c) Explain how missing data were addressed                                                                                                                                                       | 9                      |
|                              |                | (d) If applicable, describe analytical methods taking account of sampling strategy                                                                                                                | N/A                    |
|                              |                | (e) Describe any sensitivity analyses                                                                                                                                                             | 10<br>Appendix p.5     |
| <b>Results</b>               |                |                                                                                                                                                                                                   |                        |
| Participants                 | 13*            | (a) Report numbers of individuals at each stage of study—eg numbers potentially eligible, examined for eligibility, confirmed eligible, included in the study, completing follow-up, and analysed | 10<br>Appendix p.17    |
|                              |                | (b) Give reasons for non-participation at each stage                                                                                                                                              | 10                     |

|                          | <b>Item No</b> | <b>Recommendation</b>                                                                                                                                                                                        | <b>Page No</b>                              |
|--------------------------|----------------|--------------------------------------------------------------------------------------------------------------------------------------------------------------------------------------------------------------|---------------------------------------------|
|                          |                | (c) Consider use of a flow diagram                                                                                                                                                                           | N/A                                         |
| Descriptive data         | 14*            | (a) Give characteristics of study participants (eg demographic, clinical, social) and information on exposures and potential confounders                                                                     | 10, 11<br>Table 1<br>Appendix<br>p.7, 8, 17 |
|                          |                | (b) Indicate number of participants with missing data for each variable of interest                                                                                                                          | 10                                          |
| Outcome data             | 15*            | Report numbers of outcome events or summary measures                                                                                                                                                         | 11, 12, 13<br>Figure 2, 3, 4                |
| Main results             | 16             | (a) Give unadjusted estimates and, if applicable, confounder-adjusted estimates and their precision (eg, 95% confidence interval). Make clear which confounders were adjusted for and why they were included | 11, 12, 13<br>Appendix<br>p.9, 10, 11       |
|                          |                | (b) Report category boundaries when continuous variables were categorized                                                                                                                                    | N/A                                         |
|                          |                | (c) If relevant, consider translating estimates of relative risk into absolute risk for a meaningful time period                                                                                             | N/A                                         |
| Other analyses           | 17             | Report other analyses done—eg analyses of subgroups and interactions, and sensitivity analyses                                                                                                               | 11<br>Appendix<br>p.12, 13                  |
| <b>Discussion</b>        |                |                                                                                                                                                                                                              |                                             |
| Key results              | 18             | Summarise key results with reference to study objectives                                                                                                                                                     | 13                                          |
| Limitations              | 19             | Discuss limitations of the study, taking into account sources of potential bias or imprecision. Discuss both direction and magnitude of any potential bias                                                   | 15, 16, 17                                  |
| Interpretation           | 20             | Give a cautious overall interpretation of results considering objectives, limitations, multiplicity of analyses, results from similar studies, and other relevant evidence                                   | 14, 15                                      |
| Generalisability         | 21             | Discuss the generalisability (external validity) of the study results                                                                                                                                        | 17                                          |
| <b>Other information</b> |                |                                                                                                                                                                                                              |                                             |
| Funding                  | 22             | Give the source of funding and the role of the funders for the present study and, if applicable, for the original study on which the present article is based                                                | 20                                          |

\*Give information separately for exposed and unexposed groups.

**Table S3. Classifications of active physical comorbidities**

| <b>All active physical comorbidities</b>        | <b>Active physical comorbidities at risk of COVID-19 complications according to INSPQ [6]</b> | <b>Active physical comorbidities at risk of COVID-19 complications according to NACI [34]</b> |
|-------------------------------------------------|-----------------------------------------------------------------------------------------------|-----------------------------------------------------------------------------------------------|
| Diabetes                                        | Diabetes                                                                                      | Diabetes                                                                                      |
| Chronic heart disease                           | Chronic heart disease                                                                         | Chronic heart disease                                                                         |
| Chronic liver disease                           | Chronic liver disease                                                                         | Chronic liver disease                                                                         |
| Chronic renal disease                           | Chronic renal disease                                                                         | Chronic renal disease                                                                         |
| Alzheimer disease or any other dementia         | Alzheimer disease or any other dementia                                                       | Alzheimer disease or any other dementia                                                       |
| Chronic lung disease                            | Chronic lung disease                                                                          |                                                                                               |
| Cancer                                          | Cancer                                                                                        |                                                                                               |
| Immunosuppressing condition                     | Immunosuppressing condition                                                                   |                                                                                               |
| Neurologic disease                              | Neurologic disease                                                                            |                                                                                               |
| Hematologic disease                             | Hematologic disease                                                                           |                                                                                               |
| Thyroid disease                                 | Hypothyroidism                                                                                |                                                                                               |
| Arrhythmia                                      | Arrhythmia                                                                                    |                                                                                               |
| Vascular disease                                | Vascular disease                                                                              |                                                                                               |
| Hypertension                                    | Hypertension                                                                                  |                                                                                               |
| Physical disability                             | Paralysis                                                                                     |                                                                                               |
| Chronic inflammatory disease                    |                                                                                               |                                                                                               |
| Asplenia or hyposplenia                         |                                                                                               |                                                                                               |
| Arthritis or arthrosis                          |                                                                                               |                                                                                               |
| Dermatological disease                          |                                                                                               |                                                                                               |
| Multisystemic disease                           |                                                                                               |                                                                                               |
| Endocrine disease                               |                                                                                               |                                                                                               |
| Digestive disease                               |                                                                                               |                                                                                               |
| Lymphatic disease                               |                                                                                               |                                                                                               |
| Back or spinal condition                        |                                                                                               |                                                                                               |
| Other chronic pain                              |                                                                                               |                                                                                               |
| Sensory disability                              |                                                                                               |                                                                                               |
| Infectious disease                              |                                                                                               |                                                                                               |
| Sexually transmitted and blood-borne infections |                                                                                               |                                                                                               |
| Orthopedic condition                            |                                                                                               |                                                                                               |
| Migraine                                        |                                                                                               |                                                                                               |
| Vertigo or Meniere's disease                    |                                                                                               |                                                                                               |

INSPQ: Institut national de santé publique du Québec

NACI: National Advisory Committee on Immunization

**Table S4. Sample size calculations**

**A) Detectable differences\* for different scenarios<sup>†</sup> of proportion of individuals with comorbidities, sample size, design effect, and mean number of contacts among individuals with comorbidities**

| % with comorbidities | Sample size | Design effect <sup>‡</sup>                                   |       |      |       |      |       |      |       |      |       |      |       |      |       |     |    |
|----------------------|-------------|--------------------------------------------------------------|-------|------|-------|------|-------|------|-------|------|-------|------|-------|------|-------|-----|----|
|                      |             | 1                                                            |       |      |       | 2    |       |      |       | 5    |       |      |       | 10   |       |     |    |
|                      |             | Mean number of contacts among individuals with comorbidities |       |      |       |      |       |      |       |      |       |      |       |      |       |     |    |
|                      |             | 1                                                            |       | 3    |       | 1    |       | 3    |       | 1    |       | 3    |       | 1    |       | 3   |    |
| Diff                 | Power       | Diff                                                         | Power | Diff | Power | Diff | Power | Diff | Power | Diff | Power | Diff | Power | Diff | Power |     |    |
| 22%                  | 400         | 0.4                                                          | 82    | 0.7  | 87    | 0.6  | 82    | 1.0  | 85    | 1.1  | 83    | 1.6  | 81    | 1.7  | 80    | 2.0 | 68 |
| 22%                  | 800         | 0.3                                                          | 88    | 0.5  | 89    | 0.4  | 82    | 0.7  | 87    | 0.7  | 83    | 1.1  | 83    | 1.1  | 83    | 1.6 | 81 |
| 22%                  | 1200        | 0.3                                                          | 97    | 0.4  | 88    | 0.4  | 94    | 0.6  | 90    | 0.6  | 88    | 0.9  | 85    | 0.8  | 80    | 1.3 | 83 |
| 35%                  | 100         | 0.8                                                          | 86    | 1.2  | 83    | 1.2  | 84    | 1.7  | 80    | 2.0  | 76    | 2.0  | 53    | 2.0  | 47    | 2.0 | 30 |
| 35%                  | 200         | 0.5                                                          | 83    | 0.8  | 82    | 0.8  | 86    | 1.2  | 83    | 1.3  | 80    | 2.0  | 82    | 2.0  | 76    | 2.0 | 53 |

\* Differences of up to 2.0 were considered in power calculations. When a power greater than 80% could not be achieved with the maximum value of 2.0, the power for that difference is presented.

<sup>†</sup> Scenarios with proportion of 22% with comorbidities and n=400, 800, 1200 represent sample sizes observed for all adults and adults aged 18 to 65 years, and scenarios with proportion of 35% with comorbidities and n=100, 200 represent sample sizes observed for adults aged over 65 years.

<sup>‡</sup> The design effect represents the inflation in variance between the observed variance in our study compared to the theoretical variance of a Poisson distribution with simple random sampling.

**B) Observed design effects for comparisons of contacts between individuals with and without comorbidities\***

|                 | Total contacts |                 | Contacts at home with household members |                 | Contacts with visitors at home and contacts in other locations |                 |
|-----------------|----------------|-----------------|-----------------------------------------|-----------------|----------------------------------------------------------------|-----------------|
|                 | Pre-COVID      | During pandemic | Pre-COVID                               | During pandemic | Pre-COVID                                                      | During pandemic |
| All adults      | 11.2           | 5.1 to 9.5      | 1.2                                     | 0.7 to 1.3      | 12.3                                                           | 5.9 to 11.2     |
| 18-65 years old | 19.1           | 7.7 to 12.4     | 1.5                                     | 0.7 to 1.1      | 20.9                                                           | 9.1 to 15.1     |
| >65 years old   | 2.9            | 2.0 to 9.9      | 0.9                                     | 0.6 to 2.1      | 3.5                                                            | 3.2 to 10.1     |

\* Based on comparisons of contacts presented in Table S6.

**Table S5. Key socio-demographic characteristics of participants, by period**

|                                                         | Pre-COVID          |            |                                    |            |                                       |            | 1 <sup>st</sup> wave |            |                                    |            |                                       |            | Summer 2020 and 2 <sup>nd</sup> wave |            |                                    |            |                                       |            | 3 <sup>rd</sup> wave |            |                                    |            |                                       |            |
|---------------------------------------------------------|--------------------|------------|------------------------------------|------------|---------------------------------------|------------|----------------------|------------|------------------------------------|------------|---------------------------------------|------------|--------------------------------------|------------|------------------------------------|------------|---------------------------------------|------------|----------------------|------------|------------------------------------|------------|---------------------------------------|------------|
|                                                         | All participants   |            | With active physical comorbidities |            | Without active physical comorbidities |            | All participants     |            | With active physical comorbidities |            | Without active physical comorbidities |            | All participants                     |            | With active physical comorbidities |            | Without active physical comorbidities |            | All participants     |            | With active physical comorbidities |            | Without active physical comorbidities |            |
|                                                         | N <sub>crude</sub> | % weighted | N <sub>crude</sub>                 | % weighted | N <sub>crude</sub>                    | % weighted | N <sub>crude</sub>   | % weighted | N <sub>crude</sub>                 | % weighted | N <sub>crude</sub>                    | % weighted | N <sub>crude</sub>                   | % weighted | N <sub>crude</sub>                 | % weighted | N <sub>crude</sub>                    | % weighted | N <sub>crude</sub>   | % weighted | N <sub>crude</sub>                 | % weighted | N <sub>crude</sub>                    | % weighted |
| <b>Total</b>                                            | <b>792</b>         |            | <b>203</b>                         |            | <b>589</b>                            |            | <b>413</b>           |            | <b>100</b>                         |            | <b>313</b>                            |            | <b>4125</b>                          |            | <b>851</b>                         |            | <b>3274</b>                           |            | <b>1296</b>          |            | <b>287</b>                         |            | <b>1009</b>                           |            |
| <b>Age</b>                                              |                    |            |                                    |            |                                       |            |                      |            |                                    |            |                                       |            |                                      |            |                                    |            |                                       |            |                      |            |                                    |            |                                       |            |
| 18-25 yrs old                                           | 95                 | 10.9       | 5                                  | 1.4        | 90                                    | 14.1       | 53                   | 11.8       | 8                                  | 5.6        | 45                                    | 14.2       | 532                                  | 12.0       | 38                                 | 3.6        | 494                                   | 14.2       | 185                  | 11.7       | 18                                 | 4.5        | 167                                   | 13.8       |
| 26-45 yrs old                                           | 197                | 35.3       | 32                                 | 26.8       | 165                                   | 38.2       | 181                  | 34.0       | 35                                 | 20.6       | 146                                   | 39.1       | 1369                                 | 34.4       | 193                                | 21.6       | 1176                                  | 37.9       | 457                  | 34.2       | 92                                 | 29.1       | 365                                   | 35.8       |
| 46-65 yrs old                                           | 294                | 33.0       | 87                                 | 39.4       | 207                                   | 30.8       | 129                  | 32.8       | 37                                 | 34.6       | 92                                    | 32.1       | 1610                                 | 33.3       | 414                                | 39.5       | 1196                                  | 31.6       | 470                  | 32.5       | 106                                | 32.2       | 364                                   | 32.6       |
| 66-75 yrs old                                           | 159                | 12.6       | 60                                 | 19.2       | 99                                    | 10.4       | 45                   | 12.6       | 16                                 | 17.0       | 29                                    | 11.0       | 535                                  | 12.5       | 167                                | 18.1       | 368                                   | 10.9       | 162                  | 12.4       | 62                                 | 20.6       | 100                                   | 9.9        |
| >75 yrs old                                             | 47                 | 8.3        | 19                                 | 13.3       | 28                                    | 6.6        | 5                    | 8.8        | 4                                  | 22.2       | 1                                     | 3.7        | 79                                   | 7.9        | 39                                 | 17.2       | 40                                    | 5.4        | 22                   | 9.3        | 9                                  | 13.6       | 13                                    | 8.0        |
| <b>Sex</b>                                              |                    |            |                                    |            |                                       |            |                      |            |                                    |            |                                       |            |                                      |            |                                    |            |                                       |            |                      |            |                                    |            |                                       |            |
| Male                                                    | 350                | 50.1       | 91                                 | 49.4       | 259                                   | 50.3       | 169                  | 49.1       | 39                                 | 49.7       | 130                                   | 48.9       | 2018                                 | 49.8       | 413                                | 47.8       | 1605                                  | 50.4       | 577                  | 50.2       | 127                                | 51.3       | 450                                   | 49.9       |
| Female                                                  | 442                | 49.9       | 112                                | 50.6       | 330                                   | 49.7       | 244                  | 50.9       | 61                                 | 50.3       | 183                                   | 51.1       | 2107                                 | 50.2       | 438                                | 52.2       | 1669                                  | 49.6       | 719                  | 49.8       | 160                                | 48.7       | 559                                   | 50.2       |
| <b>Region</b>                                           |                    |            |                                    |            |                                       |            |                      |            |                                    |            |                                       |            |                                      |            |                                    |            |                                       |            |                      |            |                                    |            |                                       |            |
| Greater Montreal†                                       | 407                | 62.6       | 103                                | 62.1       | 304                                   | 62.7       | 293                  | 64.3       | 78                                 | 67.9       | 215                                   | 62.9       | 2356                                 | 61.2       | 486                                | 62.8       | 1870                                  | 60.7       | 749                  | 61.1       | 168                                | 59.5       | 581                                   | 61.5       |
| Other Quebec regions                                    | 377                | 37.5       | 99                                 | 37.9       | 278                                   | 37.3       | 120                  | 35.8       | 22                                 | 32.1       | 98                                    | 37.2       | 1766                                 | 38.8       | 365                                | 37.2       | 1401                                  | 39.3       | 545                  | 38.9       | 119                                | 40.5       | 426                                   | 38.5       |
| Missing                                                 | 8                  | --         | 1                                  | --         | 7                                     | --         | --                   | --         | --                                 | --         | --                                    | --         | 3                                    | --         | --                                 | --         | 3                                     | --         | 2                    | --         | --                                 | --         | 2                                     | --         |
| <b>Household size</b>                                   |                    |            |                                    |            |                                       |            |                      |            |                                    |            |                                       |            |                                      |            |                                    |            |                                       |            |                      |            |                                    |            |                                       |            |
| 1                                                       | 236                | 30.0       | 72                                 | 35.6       | 164                                   | 28.2       | 124                  | 29.9       | 32                                 | 28.3       | 92                                    | 30.5       | 1007                                 | 24.7       | 252                                | 30.5       | 755                                   | 23.1       | 328                  | 27.4       | 77                                 | 29.3       | 251                                   | 26.9       |
| 2                                                       | 389                | 43.1       | 107                                | 45.9       | 282                                   | 42.2       | 182                  | 45.5       | 53                                 | 60.5       | 129                                   | 39.7       | 2086                                 | 49.3       | 473                                | 55.7       | 1613                                  | 47.5       | 624                  | 47.1       | 156                                | 52.5       | 468                                   | 45.5       |
| 3                                                       | 87                 | 10.9       | 15                                 | 10.3       | 72                                    | 11.1       | 41                   | 9.3        | 5                                  | 3.6        | 36                                    | 11.5       | 488                                  | 11.9       | 58                                 | 6.1        | 430                                   | 13.5       | 173                  | 12.6       | 29                                 | 9.2        | 144                                   | 13.7       |
| 4+                                                      | 80                 | 16.0       | 9                                  | 8.2        | 71                                    | 18.5       | 66                   | 15.4       | 10                                 | 7.6        | 56                                    | 18.4       | 544                                  | 14.2       | 68                                 | 7.7        | 476                                   | 15.9       | 171                  | 12.9       | 25                                 | 9.1        | 146                                   | 14.0       |
| <b>Education Level</b>                                  |                    |            |                                    |            |                                       |            |                      |            |                                    |            |                                       |            |                                      |            |                                    |            |                                       |            |                      |            |                                    |            |                                       |            |
| No diploma, degree                                      | 64                 | 7.8        | 23                                 | 10.7       | 41                                    | 6.9        | 20                   | 5.1        | 6                                  | 5.6        | 14                                    | 4.9        | 172                                  | 4.1        | 44                                 | 4.7        | 128                                   | 3.9        | 45                   | 3.5        | 10                                 | 4.1        | 35                                    | 3.3        |
| Secondary (high) school                                 | 120                | 14.4       | 28                                 | 15.1       | 92                                    | 14.1       | 56                   | 14.5       | 14                                 | 13.6       | 42                                    | 14.8       | 561                                  | 13.9       | 118                                | 13.8       | 443                                   | 14.0       | 153                  | 11.0       | 32                                 | 9.8        | 121                                   | 11.4       |
| College, CEGEP, university or other certificate/diploma | 608                | 77.8       | 152                                | 74.2       | 456                                   | 79.0       | 337                  | 80.5       | 80                                 | 80.8       | 257                                   | 80.4       | 3392                                 | 82.0       | 689                                | 81.5       | 2703                                  | 82.1       | 1098                 | 85.5       | 245                                | 86.2       | 853                                   | 85.3       |
| <b>Main occupation</b>                                  |                    |            |                                    |            |                                       |            |                      |            |                                    |            |                                       |            |                                      |            |                                    |            |                                       |            |                      |            |                                    |            |                                       |            |
| Student employed or unemployed                          | 76                 | 10.8       | 6                                  | 3.2        | 70                                    | 13.3       | 51                   | 10.4       | 9                                  | 5.2        | 42                                    | 12.5       | 481                                  | 11.1       | 47                                 | 4.9        | 434                                   | 12.8       | 153                  | 10.3       | 22                                 | 7.2        | 131                                   | 11.2       |
| Employed or semi-retired                                | 363                | 49.5       | 61                                 | 33.7       | 302                                   | 54.8       | 230                  | 50.6       | 53                                 | 40.7       | 177                                   | 54.4       | 2435                                 | 56.6       | 431                                | 45.7       | 2004                                  | 59.5       | 766                  | 55.7       | 143                                | 44.4       | 623                                   | 59.1       |
| Temporarily not working or seeking work                 | 18                 | 2.6        | 6                                  | 4.0        | 12                                    | 2.1        | 59                   | 12.4       | 12                                 | 10.3       | 47                                    | 13.2       | 266                                  | 5.9        | 75                                 | 7.5        | 191                                   | 5.5        | 94                   | 6.4        | 25                                 | 7.5        | 69                                    | 6.1        |
| Unemployed or retired                                   | 335                | 37.1       | 130                                | 59.2       | 205                                   | 29.8       | 73                   | 26.6       | 26                                 | 43.8       | 47                                    | 19.9       | 943                                  | 26.5       | 298                                | 41.9       | 645                                   | 22.2       | 283                  | 27.7       | 97                                 | 40.9       | 186                                   | 23.7       |

|                                                | Pre-COVID          |            |                                    |            |                                       |            | 1 <sup>st</sup> wave |            |                                    |            |                                       |            | Summer 2020 and 2 <sup>nd</sup> wave |            |                                    |            |                                       |            | 3 <sup>rd</sup> wave |            |                                    |            |                                       |            |
|------------------------------------------------|--------------------|------------|------------------------------------|------------|---------------------------------------|------------|----------------------|------------|------------------------------------|------------|---------------------------------------|------------|--------------------------------------|------------|------------------------------------|------------|---------------------------------------|------------|----------------------|------------|------------------------------------|------------|---------------------------------------|------------|
|                                                | All participants   |            | With active physical comorbidities |            | Without active physical comorbidities |            | All participants     |            | With active physical comorbidities |            | Without active physical comorbidities |            | All participants                     |            | With active physical comorbidities |            | Without active physical comorbidities |            | All participants     |            | With active physical comorbidities |            | Without active physical comorbidities |            |
|                                                | N <sub>crude</sub> | % weighted | N <sub>crude</sub>                 | % weighted | N <sub>crude</sub>                    | % weighted | N <sub>crude</sub>   | % weighted | N <sub>crude</sub>                 | % weighted | N <sub>crude</sub>                    | % weighted | N <sub>crude</sub>                   | % weighted | N <sub>crude</sub>                 | % weighted | N <sub>crude</sub>                    | % weighted | N <sub>crude</sub>   | % weighted | N <sub>crude</sub>                 | % weighted | N <sub>crude</sub>                    | % weighted |
| <b>Type of employment*</b>                     |                    |            |                                    |            |                                       |            |                      |            |                                    |            |                                       |            |                                      |            |                                    |            |                                       |            |                      |            |                                    |            |                                       |            |
| Education                                      | 54                 | 13.5       | 9                                  | 10.0       | 45                                    | 14.1       | 27                   | 9.1        | 8                                  | 13.0       | 19                                    | 7.9        | 228                                  | 8.5        | 40                                 | 8.6        | 188                                   | 8.5        | 90                   | 10.0       | 18                                 | 11.5       | 72                                    | 9.6        |
| Health                                         | 45                 | 11.2       | 9                                  | 11.2       | 36                                    | 11.3       | 30                   | 9.3        | 6                                  | 8.1        | 24                                    | 9.6        | 227                                  | 8.2        | 46                                 | 9.4        | 181                                   | 8.0        | 77                   | 8.5        | 18                                 | 10.5       | 59                                    | 8.0        |
| Sales and services                             | 58                 | 14.7       | 9                                  | 18.0       | 49                                    | 14.0       | 35                   | 11.8       | 7                                  | 11.3       | 28                                    | 12.0       | 336                                  | 12.8       | 61                                 | 13.1       | 275                                   | 12.7       | 108                  | 12.5       | 21                                 | 13.3       | 87                                    | 12.3       |
| Other sectors                                  | 215                | 60.6       | 34                                 | 60.8       | 181                                   | 60.6       | 188                  | 69.8       | 44                                 | 67.7       | 144                                   | 70.5       | 1841                                 | 70.5       | 318                                | 68.9       | 1523                                  | 70.9       | 558                  | 69.1       | 94                                 | 64.8       | 464                                   | 70.1       |
| Missing                                        | --                 | --         | --                                 | --         | --                                    | --         | 1                    | --         | --                                 | --         | 1                                     | --         | 18                                   | --         | 3                                  | --         | 15                                    | --         | 4                    | --         | --                                 | --         | 4                                     | --         |
| <b>Race/Ethnicity</b>                          |                    |            |                                    |            |                                       |            |                      |            |                                    |            |                                       |            |                                      |            |                                    |            |                                       |            |                      |            |                                    |            |                                       |            |
| White                                          | 728                | 91.6       | 192                                | 95.0       | 536                                   | 90.5       | 355                  | 89.3       | 93                                 | 94.8       | 262                                   | 87.2       | 3750                                 | 91.7       | 796                                | 95.0       | 2954                                  | 90.8       | 1150                 | 89.9       | 256                                | 89.6       | 894                                   | 90.0       |
| Other                                          | 57                 | 8.4        | 11                                 | 5.1        | 46                                    | 9.5        | 51                   | 10.7       | 7                                  | 5.2        | 44                                    | 12.8       | 325                                  | 8.3        | 44                                 | 5.0        | 281                                   | 9.2        | 128                  | 10.1       | 26                                 | 10.4       | 102                                   | 10.0       |
| Missing                                        | 7                  | --         | --                                 | --         | 7                                     | --         | 7                    | --         | --                                 | --         | 7                                     | --         | 50                                   | --         | 11                                 | --         | 39                                    | --         | 18                   | --         | 5                                  | --         | 13                                    | --         |
| <b>Country of origin</b>                       |                    |            |                                    |            |                                       |            |                      |            |                                    |            |                                       |            |                                      |            |                                    |            |                                       |            |                      |            |                                    |            |                                       |            |
| Canadian-born                                  | 729                | 90.4       | 195                                | 94.9       | 534                                   | 88.9       | 348                  | 86.8       | 91                                 | 94.5       | 257                                   | 83.9       | 3696                                 | 88.6       | 789                                | 91.9       | 2907                                  | 87.7       | 1144                 | 88.1       | 255                                | 87.9       | 889                                   | 88.2       |
| Foreign-born                                   | 63                 | 9.6        | 8                                  | 5.1        | 55                                    | 11.1       | 64                   | 13.2       | 9                                  | 5.5        | 55                                    | 16.1       | 422                                  | 11.4       | 62                                 | 8.1        | 360                                   | 12.3       | 151                  | 11.9       | 32                                 | 12.1       | 119                                   | 11.8       |
| Missing                                        | --                 | --         | --                                 | --         | --                                    | --         | 1                    | --         | --                                 | --         | 1                                     | --         | 7                                    | --         | --                                 | --         | 7                                     | --         | 1                    | --         | --                                 | --         | 1                                     | --         |
| <b>Number of active physical comorbidities</b> |                    |            |                                    |            |                                       |            |                      |            |                                    |            |                                       |            |                                      |            |                                    |            |                                       |            |                      |            |                                    |            |                                       |            |
| 1                                              | --                 | --         | 143                                | 71.2       | --                                    | --         | --                   | --         | 79                                 | 74.6       | --                                    | --         | --                                   | --         | 672                                | 79.6       | --                                    | --         | --                   | --         | 234                                | 82.0       | --                                    | --         |
| 2                                              | --                 | --         | 44                                 | 22.2       | --                                    | --         | --                   | --         | 14                                 | 18.8       | --                                    | --         | --                                   | --         | 143                                | 15.7       | --                                    | --         | --                   | --         | 45                                 | 15.6       | --                                    | --         |
| 3+                                             | --                 | --         | 16                                 | 6.6        | --                                    | --         | --                   | --         | 7                                  | 6.5        | --                                    | --         | --                                   | --         | 36                                 | 4.7        | --                                    | --         | --                   | --         | 8                                  | 2.4        | --                                    | --         |
| <b>Type of comorbidities</b>                   |                    |            |                                    |            |                                       |            |                      |            |                                    |            |                                       |            |                                      |            |                                    |            |                                       |            |                      |            |                                    |            |                                       |            |
| Chronic lung disease                           | --                 | --         | 41                                 | 19.4       | --                                    | --         | --                   | --         | 33                                 | 28.0       | --                                    | --         | --                                   | --         | 182                                | 20.6       | --                                    | --         | --                   | --         | 59                                 | 18.6       | --                                    | --         |
| Diabetes                                       | --                 | --         | 54                                 | 23.7       | --                                    | --         | --                   | --         | 19                                 | 23.2       | --                                    | --         | --                                   | --         | 176                                | 20.2       | --                                    | --         | --                   | --         | 59                                 | 21.6       | --                                    | --         |
| Chronic inflammatory disease                   | --                 | --         | 35                                 | 16.7       | --                                    | --         | --                   | --         | 11                                 | 7.8        | --                                    | --         | --                                   | --         | 141                                | 17.2       | --                                    | --         | --                   | --         | 49                                 | 15.0       | --                                    | --         |
| Hypertension                                   | --                 | --         | 25                                 | 10.7       | --                                    | --         | --                   | --         | 9                                  | 8.2        | --                                    | --         | --                                   | --         | 101                                | 14.1       | --                                    | --         | --                   | --         | 30                                 | 12.5       | --                                    | --         |
| Chronic heart disease                          | --                 | --         | 29                                 | 14.6       | --                                    | --         | --                   | --         | 3                                  | 6.0        | --                                    | --         | --                                   | --         | 81                                 | 9.6        | --                                    | --         | --                   | --         | 24                                 | 10.2       | --                                    | --         |
| Cancer                                         | --                 | --         | 19                                 | 9.6        | --                                    | --         | --                   | --         | 8                                  | 18.9       | --                                    | --         | --                                   | --         | 51                                 | 6.7        | --                                    | --         | --                   | --         | 20                                 | 7.3        | --                                    | --         |
| Thyroid disease                                | --                 | --         | 10                                 | 6.5        | --                                    | --         | --                   | --         | 6                                  | 4.3        | --                                    | --         | --                                   | --         | 60                                 | 6.9        | --                                    | --         | --                   | --         | 20                                 | 8.2        | --                                    | --         |
| Neurologic disease                             | --                 | --         | 14                                 | 5.4        | --                                    | --         | --                   | --         | 8                                  | 6.5        | --                                    | --         | --                                   | --         | 55                                 | 5.7        | --                                    | --         | --                   | --         | 12                                 | 3.9        | --                                    | --         |
| Arthritis and arthrosis                        | --                 | --         | 16                                 | 8.3        | --                                    | --         | --                   | --         | 5                                  | 4.3        | --                                    | --         | --                                   | --         | 36                                 | 4.1        | --                                    | --         | --                   | --         | 8                                  | 2.5        | --                                    | --         |
| Others                                         | --                 | --         | 36                                 | 19.5       | --                                    | --         | --                   | --         | 24                                 | 22.7       | --                                    | --         | --                                   | --         | 177                                | 19.5       | --                                    | --         | --                   | --         | 66                                 | 20.4       | --                                    | --         |

**Pre-COVID:** February 1<sup>st</sup> 2018 to March 17<sup>th</sup> 2019; **1<sup>st</sup> wave:** April 21<sup>st</sup> to May 25<sup>th</sup> 2020; **Summer 2020 and 2<sup>nd</sup> wave:** July 3<sup>rd</sup> 2020 to March 20<sup>th</sup> 2021; **3<sup>rd</sup> wave:** March 21<sup>st</sup> to July 4<sup>th</sup> 2021.

† Greater Montreal: Regions of Montreal, Laval, Montérégie, Lanaudière, Laurentides

\* Type of employment: among 18-65-year-olds employed or temporarily not working



**Table S6. Time trends in the mean number of social contacts of individuals with and without active physical comorbidities**

**A) Total contacts**

|                                         | Pre-COVID<br>n=792 |            |  | 1 <sup>st</sup> wave<br>n=413 |           |                | Summer 2020<br>n=679 |           |                | 2 <sup>nd</sup> wave before holidays<br>n=1261 |           |                | Holidays<br>n=1197 |           |                | 2 <sup>nd</sup> wave after holidays<br>n=988 |           |                | 3 <sup>rd</sup> wave<br>n=1296 |           |                |
|-----------------------------------------|--------------------|------------|--|-------------------------------|-----------|----------------|----------------------|-----------|----------------|------------------------------------------------|-----------|----------------|--------------------|-----------|----------------|----------------------------------------------|-----------|----------------|--------------------------------|-----------|----------------|
|                                         | mean               | 95% CI     |  | mean                          | 95% CI    | p <sup>‡</sup> | mean                 | 95% CI    | p <sup>‡</sup> | mean                                           | 95% CI    | p <sup>‡</sup> | mean               | 95% CI    | p <sup>‡</sup> | mean                                         | 95% CI    | p <sup>‡</sup> | mean                           | 95% CI    | p <sup>‡</sup> |
| <b>All adults*</b><br><b>Total</b>      | 7.6                | (6.9-8.3)  |  | 2.9                           | (2.5-3.3) | <.001          | 4.3                  | (3.7-4.8) | <.001          | 3.6                                            | (3.3-3.9) | 0.05           | 2.9                | (2.6-3.1) | <.001          | 3.3                                          | (3.0-3.6) | 0.02           | 4.4                            | (4.0-4.7) | <.001          |
| Without<br>comorbidities                | 8.1                | (7.3-9.0)  |  | 2.7                           | (2.2-3.2) | <.001          | 4.3                  | (3.6-5.0) | <.001          | 3.9                                            | (3.5-4.3) | 0.38           | 2.8                | (2.5-3.1) | <.001          | 3.4                                          | (3.0-3.7) | 0.01           | 4.5                            | (4.1-4.9) | <.001          |
| With<br>comorbidities                   | 6.1                | (4.9-7.3)  |  | 3.2                           | (2.5-3.9) | <.001          | 4.2                  | (3.5-4.9) | 0.03           | 2.9                                            | (2.5-3.2) | 0.001          | 3.0                | (2.6-3.4) | 0.67           | 3.0                                          | (2.6-3.5) | 0.81           | 4.1                            | (3.4-4.7) | 0.009          |
| Diff <sup>†</sup> (p-value)             | -2.0               | (0.008)    |  | 0.5                           | (0.23)    |                | -0.1                 | (0.92)    |                | -1.0                                           | (<.001)   |                | 0.2                | (0.41)    |                | -0.3                                         | (0.30)    |                | -0.4                           | (0.27)    |                |
| <b>18-65 years old*</b><br><b>Total</b> | 8.9                | (8.0-9.9)  |  | 3.3                           | (2.6-3.9) | <.001          | 4.4                  | (3.8-5.0) | 0.009          | 4.2                                            | (3.8-4.7) | 0.66           | 3.1                | (2.8-3.5) | <.001          | 3.7                                          | (3.2-4.1) | 0.05           | 5.1                            | (4.6-5.5) | <.001          |
| Without<br>comorbidities                | 9.3                | (8.2-10.4) |  | 3.2                           | (2.5-3.9) | <.001          | 4.3                  | (3.6-5.0) | 0.02           | 4.5                                            | (4.0-5.0) | 0.66           | 3.1                | (2.7-3.5) | <.001          | 3.9                                          | (3.3-4.4) | 0.02           | 5.2                            | (4.7-5.7) | <.001          |
| With<br>comorbidities                   | 7.7                | (5.7-9.7)  |  | 3.5                           | (1.9-5.0) | 0.001          | 4.9                  | (3.6-6.3) | 0.16           | 3.2                                            | (2.6-3.8) | 0.03           | 3.2                | (2.4-4.0) | 0.91           | 2.8                                          | (2.1-3.6) | 0.51           | 4.6                            | (3.6-5.6) | 0.006          |
| Diff <sup>†</sup> (p-value)             | -1.6               | (0.16)     |  | 0.3                           | (0.76)    |                | 0.7                  | (0.40)    |                | -1.2                                           | (0.003)   |                | 0.1                | (0.84)    |                | -1.0                                         | (0.03)    |                | -0.6                           | (0.34)    |                |
| <b>&gt;65 years old</b><br><b>Total</b> | 3.5                | (3.0-4.0)  |  | 1.2                           | (0.7-1.6) | <.001          | 2.8                  | (1.9-3.7) | 0.002          | 1.5                                            | (1.3-1.8) | 0.008          | 1.2                | (1.0-1.5) | 0.10           | 1.5                                          | (1.2-1.9) | 0.13           | 2.1                            | (1.7-2.6) | 0.05           |
| Without<br>comorbidities                | 4.0                | (3.3-4.8)  |  | 1.0                           | (0.3-1.7) | <.001          | 3.3                  | (1.8-4.7) | 0.006          | 1.8                                            | (1.5-2.0) | 0.05           | 1.3                | (0.9-1.6) | 0.01           | 1.5                                          | (1.1-2.0) | 0.35           | 2.1                            | (1.5-2.8) | 0.12           |
| With<br>comorbidities                   | 2.8                | (2.3-3.3)  |  | 1.3                           | (0.8-1.8) | <.001          | 2.1                  | (1.4-2.7) | 0.07           | 1.0                                            | (0.6-1.4) | 0.009          | 1.2                | (0.9-1.5) | 0.46           | 1.6                                          | (1.1-2.1) | 0.18           | 2.1                            | (1.4-2.8) | 0.22           |
| Diff <sup>†</sup> (p-value)             | -1.2               | (0.006)    |  | 0.3                           | (0.49)    |                | -1.2                 | (0.13)    |                | -0.8                                           | (<.001)   |                | -0.1               | (0.78)    |                | 0.1                                          | (0.87)    |                | -0.0                           | (0.93)    |                |

**Pre-COVID:** February 1<sup>st</sup> 2018 to March 17<sup>th</sup> 2019; **1<sup>st</sup> wave:** April 21<sup>st</sup> to May 25<sup>th</sup> 2020; **Summer 2020:** July 3<sup>rd</sup> to August 22<sup>nd</sup> 2020; **2<sup>nd</sup> wave:** August 23<sup>rd</sup> 2020 to March 20<sup>th</sup> 2021;

**Holidays:** December 17<sup>th</sup> 2020 to January 8<sup>th</sup> 2021; **3<sup>rd</sup> wave:** March 21<sup>st</sup> to July 4<sup>th</sup> 2021.

<sup>‡</sup>p: p-value of the difference with the preceding period

\* Results for all adults and 18-65-year-olds are adjusted for age

<sup>†</sup>Diff: Difference between individuals with and without comorbidities and p-value of this difference

## B) Contacts at home with household members

|                                         | Pre-COVID<br>n=792 |           | 1 <sup>st</sup> wave<br>n=413 |           |                       | Summer 2020<br>n=679 |           |                       | 2 <sup>nd</sup> wave before holidays<br>n=1261 |           |                       | Holidays<br>n=1197 |           |                       | 2 <sup>nd</sup> wave after holidays<br>n=988 |           |                       | 3 <sup>rd</sup> wave<br>n=1296 |           |                       |
|-----------------------------------------|--------------------|-----------|-------------------------------|-----------|-----------------------|----------------------|-----------|-----------------------|------------------------------------------------|-----------|-----------------------|--------------------|-----------|-----------------------|----------------------------------------------|-----------|-----------------------|--------------------------------|-----------|-----------------------|
|                                         | mean               | 95% CI    | mean                          | 95% CI    | <i>p</i> <sup>‡</sup> | mean                 | 95% CI    | <i>p</i> <sup>‡</sup> | mean                                           | 95% CI    | <i>p</i> <sup>‡</sup> | mean               | 95% CI    | <i>p</i> <sup>‡</sup> | mean                                         | 95% CI    | <i>p</i> <sup>‡</sup> | mean                           | 95% CI    | <i>p</i> <sup>‡</sup> |
| <b>All adults*</b><br><b>Total</b>      | 0.9                | (0.8-1.0) | 0.9                           | (0.8-1.1) | 0.33                  | 0.9                  | (0.8-1.0) | 0.80                  | 1.0                                            | (0.9-1.0) | 0.21                  | 1.0                | (0.9-1.0) | 0.97                  | 1.0                                          | (1.0-1.1) | 0.26                  | 1.0                            | (0.9-1.0) | 0.15                  |
| Without<br>comorbidities                | 0.9                | (0.8-1.0) | 0.9                           | (0.8-1.0) | 0.43                  | 0.9                  | (0.8-1.0) | 0.80                  | 1.0                                            | (1.0-1.1) | 0.04                  | 1.0                | (0.9-1.1) | 0.49                  | 1.0                                          | (1.0-1.1) | 0.29                  | 1.0                            | (0.9-1.0) | 0.11                  |
| With<br>comorbidities                   | 0.9                | (0.8-1.0) | 1.0                           | (0.7-1.2) | 0.57                  | 1.0                  | (0.8-1.1) | 0.99                  | 0.9                                            | (0.8-1.0) | 0.31                  | 1.0                | (0.9-1.1) | 0.25                  | 1.0                                          | (0.9-1.1) | 0.79                  | 1.0                            | (0.9-1.1) | 0.98                  |
| Diff <sup>†</sup> ( <i>p</i> -value)    | 0.0                | (0.61)    | 0.1                           | (0.69)    |                       | 0.1                  | (0.42)    |                       | -0.1                                           | (0.03)    |                       | -0.0               | (0.70)    |                       | -0.1                                         | (0.40)    |                       | 0.0                            | (0.72)    |                       |
| <b>18-65 years old*</b><br><b>Total</b> | 1.0                | (0.9-1.1) | 1.0                           | (0.9-1.1) | 0.63                  | 1.0                  | (0.9-1.1) | 0.71                  | 1.1                                            | (1.0-1.1) | 0.10                  | 1.1                | (1.0-1.2) | 0.87                  | 1.1                                          | (1.1-1.2) | 0.36                  | 1.1                            | (1.1-1.2) | 0.58                  |
| Without<br>comorbidities                | 1.0                | (0.9-1.1) | 1.1                           | (1.0-1.2) | 0.24                  | 1.0                  | (0.9-1.1) | 0.23                  | 1.1                                            | (1.0-1.2) | 0.08                  | 1.1                | (1.0-1.2) | 0.93                  | 1.2                                          | (1.1-1.2) | 0.30                  | 1.1                            | (1.0-1.2) | 0.30                  |
| With<br>comorbidities                   | 1.0                | (0.8-1.2) | 0.8                           | (0.7-1.0) | 0.13                  | 1.0                  | (0.9-1.2) | 0.09                  | 1.0                                            | (0.9-1.2) | 0.83                  | 1.1                | (0.9-1.2) | 0.90                  | 1.0                                          | (0.9-1.2) | 0.81                  | 1.1                            | (1.0-1.3) | 0.31                  |
| Diff <sup>†</sup> ( <i>p</i> -value)    | 0.0                | (0.96)    | -0.3                          | (0.008)   |                       | 0.0                  | (0.83)    |                       | -0.1                                           | (0.38)    |                       | -0.1               | (0.50)    |                       | -0.1                                         | (0.09)    |                       | 0.0                            | (0.76)    |                       |
| <b>&gt;65 years old</b><br><b>Total</b> | 0.4                | (0.3-0.5) | 0.6                           | (0.3-0.8) | 0.37                  | 0.5                  | (0.4-0.7) | 0.87                  | 0.6                                            | (0.5-0.7) | 0.69                  | 0.6                | (0.5-0.7) | 0.86                  | 0.6                                          | (0.5-0.7) | 0.48                  | 0.5                            | (0.4-0.6) | 0.08                  |
| Without<br>comorbidities                | 0.4                | (0.3-0.5) | 0.3                           | (0.1-0.5) | 0.58                  | 0.5                  | (0.3-0.8) | 0.25                  | 0.7                                            | (0.6-0.8) | 0.21                  | 0.6                | (0.5-0.7) | 0.20                  | 0.6                                          | (0.5-0.7) | 0.78                  | 0.5                            | (0.3-0.6) | 0.18                  |
| With<br>comorbidities                   | 0.5                | (0.4-0.6) | 0.8                           | (0.4-1.2) | 0.15                  | 0.6                  | (0.4-0.8) | 0.34                  | 0.4                                            | (0.2-0.6) | 0.22                  | 0.6                | (0.4-0.7) | 0.15                  | 0.6                                          | (0.5-0.8) | 0.48                  | 0.5                            | (0.4-0.7) | 0.28                  |
| Diff <sup>†</sup> ( <i>p</i> -value)    | 0.1                | (0.32)    | 0.5                           | (0.04)    |                       | 0.1                  | (0.71)    |                       | -0.3                                           | (0.01)    |                       | -0.0               | (0.99)    |                       | 0.0                                          | (0.65)    |                       | 0.1                            | (0.59)    |                       |

**Pre-COVID:** February 1<sup>st</sup> 2018 to March 17<sup>th</sup> 2019; **1<sup>st</sup> wave:** April 21<sup>st</sup> to May 25<sup>th</sup> 2020; **Summer 2020:** July 3<sup>rd</sup> to August 22<sup>nd</sup> 2020; **2<sup>nd</sup> wave:** August 23<sup>rd</sup> 2020 to March 20<sup>th</sup> 2021; **Holidays:** December 17<sup>th</sup> 2020 to January 8<sup>th</sup> 2021; **3<sup>rd</sup> wave:** March 21<sup>st</sup> to July 4<sup>th</sup> 2021.

<sup>‡</sup>*p*: *p*-value of the difference with the preceding period

\* Results for all adults and 18-65-year-olds are adjusted for age

<sup>†</sup>Diff: Difference between individuals with and without comorbidities and *p*-value of this difference

### C) Contacts with visitors at home and contacts in other locations

|                                         | Pre-COVID<br>n=792 |           |                       | 1 <sup>st</sup> wave<br>n=413 |           |                       | Summer 2020<br>n=679 |           |                       | 2 <sup>nd</sup> wave before holidays<br>n=1261 |           |                       | Holidays<br>n=1197 |           |                       | 2 <sup>nd</sup> wave after holidays<br>n=988 |           |                       | 3 <sup>rd</sup> wave<br>n=1296 |           |                       |
|-----------------------------------------|--------------------|-----------|-----------------------|-------------------------------|-----------|-----------------------|----------------------|-----------|-----------------------|------------------------------------------------|-----------|-----------------------|--------------------|-----------|-----------------------|----------------------------------------------|-----------|-----------------------|--------------------------------|-----------|-----------------------|
|                                         | mean               | 95% CI    | <i>p</i> <sup>‡</sup> | mean                          | 95% CI    | <i>p</i> <sup>‡</sup> | mean                 | 95% CI    | <i>p</i> <sup>‡</sup> | mean                                           | 95% CI    | <i>p</i> <sup>‡</sup> | mean               | 95% CI    | <i>p</i> <sup>‡</sup> | mean                                         | 95% CI    | <i>p</i> <sup>‡</sup> | mean                           | 95% CI    | <i>p</i> <sup>‡</sup> |
| <b>All adults*</b><br><b>Total</b>      | 6.8                | (6.1-7.5) |                       | 2.0                           | (1.7-2.3) | <.001                 | 3.3                  | (2.8-3.8) | <.001                 | 2.6                                            | (2.3-2.9) | 0.02                  | 1.9                | (1.7-2.1) | <.001                 | 2.2                                          | (2.0-2.5) | 0.05                  | 3.4                            | (3.1-3.8) | <.001                 |
| Without<br>comorbidities                | 7.3                | (6.4-8.2) |                       | 1.8                           | (1.4-2.2) | <.001                 | 3.4                  | (2.7-4.0) | <.001                 | 2.8                                            | (2.5-3.2) | 0.17                  | 1.8                | (1.6-2.1) | <.001                 | 2.3                                          | (1.9-2.6) | 0.03                  | 3.5                            | (3.1-3.9) | <.001                 |
| With<br>comorbidities                   | 5.3                | (4.0-6.5) |                       | 2.1                           | (1.6-2.6) | <.001                 | 3.2                  | (2.5-3.8) | 0.009                 | 2.0                                            | (1.7-2.3) | 0.002                 | 2.0                | (1.6-2.3) | 0.95                  | 2.1                                          | (1.7-2.5) | 0.74                  | 3.1                            | (2.5-3.7) | 0.005                 |
| Diff <sup>†</sup> ( <i>p</i> -value)    | -2.1               | (0.008)   |                       | 0.3                           | (0.29)    |                       | -0.2                 | (0.68)    |                       | -0.8                                           | (<.001)   |                       | 0.2                | (0.44)    |                       | -0.2                                         | (0.40)    |                       | -0.5                           | (0.23)    |                       |
| <b>18-65 years old*</b><br><b>Total</b> | 8.0                | (7.0-8.9) |                       | 2.2                           | (1.6-2.8) | <.001                 | 3.4                  | (2.8-4.0) | 0.006                 | 3.1                                            | (2.7-3.6) | 0.42                  | 2.0                | (1.7-2.4) | <.001                 | 2.5                                          | (2.1-3.0) | 0.06                  | 4.0                            | (3.5-4.4) | <.001                 |
| Without<br>comorbidities                | 8.3                | (7.2-9.4) |                       | 2.1                           | (1.4-2.8) | <.001                 | 3.3                  | (2.7-4.0) | 0.01                  | 3.3                                            | (2.8-3.8) | 0.99                  | 2.0                | (1.6-2.4) | <.001                 | 2.7                                          | (2.2-3.2) | 0.03                  | 4.1                            | (3.5-4.6) | <.001                 |
| With<br>comorbidities                   | 6.7                | (4.7-8.7) |                       | 2.7                           | (1.2-4.2) | 0.001                 | 3.9                  | (2.5-5.3) | 0.23                  | 2.2                                            | (1.6-2.8) | 0.03                  | 2.1                | (1.3-2.9) | 0.89                  | 1.8                                          | (1.1-2.6) | 0.56                  | 3.5                            | (2.5-4.5) | 0.007                 |
| Diff <sup>†</sup> ( <i>p</i> -value)    | -1.6               | (0.17)    |                       | 0.6                           | (0.51)    |                       | 0.6                  | (0.47)    |                       | -1.1                                           | (0.004)   |                       | 0.2                | (0.74)    |                       | -0.9                                         | (0.06)    |                       | -0.6                           | (0.33)    |                       |
| <b>&gt;65 years old</b><br><b>Total</b> | 3.1                | (2.6-3.6) |                       | 0.6                           | (0.3-0.9) | <.001                 | 2.2                  | (1.4-3.0) | <.001                 | 0.9                                            | (0.7-1.2) | 0.003                 | 0.7                | (0.4-0.9) | 0.09                  | 0.9                                          | (0.6-1.2) | 0.17                  | 1.6                            | (1.2-2.1) | 0.01                  |
| Without<br>comorbidities                | 3.6                | (2.9-4.4) |                       | 0.7                           | (0.1-1.2) | <.001                 | 2.8                  | (1.5-4.0) | 0.003                 | 1.1                                            | (0.8-1.4) | 0.01                  | 0.7                | (0.4-1.0) | 0.05                  | 0.9                                          | (0.5-1.4) | 0.37                  | 1.7                            | (1.1-2.3) | 0.05                  |
| With<br>comorbidities                   | 2.3                | (1.8-2.8) |                       | 0.5                           | (0.3-0.8) | <.001                 | 1.5                  | (0.8-2.1) | 0.006                 | 0.6                                            | (0.3-0.9) | 0.02                  | 0.6                | (0.4-0.9) | 0.98                  | 0.9                                          | (0.5-1.4) | 0.22                  | 1.6                            | (0.9-2.2) | 0.11                  |
| Diff <sup>†</sup> ( <i>p</i> -value)    | -1.3               | (0.004)   |                       | -0.2                          | (0.59)    |                       | -1.3                 | (0.07)    |                       | -0.5                                           | (0.02)    |                       | -0.1               | (0.76)    |                       | 0.0                                          | (0.97)    |                       | -0.1                           | (0.83)    |                       |

**Pre-COVID:** February 1<sup>st</sup> 2018 to March 17<sup>th</sup> 2019; **1<sup>st</sup> wave:** April 21<sup>st</sup> to May 25<sup>th</sup> 2020; **Summer 2020:** July 3<sup>rd</sup> to August 22<sup>nd</sup> 2020; **2<sup>nd</sup> wave:** August 23<sup>rd</sup> 2020 to March 20<sup>th</sup> 2021; **Holidays:** December 17<sup>th</sup> 2020 to January 8<sup>th</sup> 2021; **3<sup>rd</sup> wave:** March 21<sup>st</sup> to July 4<sup>th</sup> 2021.

<sup>‡</sup>*p*: *p*-value of the difference with the preceding period

\* Results for all adults and 18-65-year-olds are adjusted for age

<sup>†</sup>Diff: Difference between individuals with and without comorbidities and *p*-value of this difference

**Table S7. Time trends in the mean total number of social contacts of individuals with and without active physical comorbidities at risk of COVID-19 complications**

**A) According to INSPQ**

|                                      | Pre-COVID<br>n=792 |            |                       | 1 <sup>st</sup> wave<br>n=413 |           |                       | Summer 2020<br>n=679 |           |                       | 2 <sup>nd</sup> wave before holidays<br>n=1261 |           |                       | Holidays<br>n=1197 |           |                       | 2 <sup>nd</sup> wave after holidays<br>n=988 |           |                       | 3 <sup>rd</sup> wave<br>n=1296 |           |                       |
|--------------------------------------|--------------------|------------|-----------------------|-------------------------------|-----------|-----------------------|----------------------|-----------|-----------------------|------------------------------------------------|-----------|-----------------------|--------------------|-----------|-----------------------|----------------------------------------------|-----------|-----------------------|--------------------------------|-----------|-----------------------|
|                                      | mean               | 95% CI     | <i>p</i> <sup>¥</sup> | mean                          | 95% CI    | <i>p</i> <sup>¥</sup> | mean                 | 95% CI    | <i>p</i> <sup>¥</sup> | mean                                           | 95% CI    | <i>p</i> <sup>¥</sup> | mean               | 95% CI    | <i>p</i> <sup>¥</sup> | mean                                         | 95% CI    | <i>p</i> <sup>¥</sup> | mean                           | 95% CI    | <i>p</i> <sup>¥</sup> |
| <b>All adults*</b>                   |                    |            |                       |                               |           |                       |                      |           |                       |                                                |           |                       |                    |           |                       |                                              |           |                       |                                |           |                       |
| Without comorbidities                | 7.9                | (7.1-8.7)  |                       | 2.8                           | (2.3-3.3) | <.001                 | 4.4                  | (3.7-5.0) | <.001                 | 3.8                                            | (3.4-4.1) | 0.12                  | 2.9                | (2.6-3.1) | <.001                 | 3.3                                          | (3.0-3.7) | 0.04                  | 4.4                            | (4.0-4.8) | <.001                 |
| With comorbidities                   | 6.3                | (4.7-7.8)  |                       | 3.0                           | (2.4-3.7) | <.001                 | 3.7                  | (3.1-4.3) | 0.11                  | 3.0                                            | (2.6-3.4) | 0.05                  | 2.8                | (2.4-3.1) | 0.44                  | 3.1                                          | (2.6-3.7) | 0.29                  | 4.1                            | (3.4-4.9) | 0.02                  |
| Diff <sup>†</sup> ( <i>p</i> -value) | -1.6               | (0.06)     |                       | 0.2                           | (0.68)    |                       | -0.7                 | (0.14)    |                       | -0.8                                           | (0.002)   |                       | -0.1               | (0.74)    |                       | -0.2                                         | (0.55)    |                       | -0.3                           | (0.47)    |                       |
| <b>18-65 years old*</b>              |                    |            |                       |                               |           |                       |                      |           |                       |                                                |           |                       |                    |           |                       |                                              |           |                       |                                |           |                       |
| Without comorbidities                | 9.1                | (8.1-10.1) |                       | 3.4                           | (2.7-4.1) | <.001                 | 4.5                  | (3.8-5.2) | 0.03                  | 4.4                                            | (3.9-4.9) | 0.79                  | 3.2                | (2.8-3.6) | <.001                 | 3.8                                          | (3.3-4.3) | 0.07                  | 5.1                            | (4.6-5.6) | <.001                 |
| With comorbidities                   | 8.0                | (5.3-10.7) |                       | 2.6                           | (1.1-4.1) | 0.001                 | 3.9                  | (3.0-4.9) | 0.13                  | 3.3                                            | (2.6-4.1) | 0.32                  | 2.6                | (1.9-3.2) | 0.10                  | 2.9                                          | (2.0-3.9) | 0.51                  | 4.8                            | (3.5-6.1) | 0.02                  |
| Diff <sup>†</sup> ( <i>p</i> -value) | -1.0               | (0.48)     |                       | -0.8                          | (0.32)    |                       | -0.6                 | (0.35)    |                       | -1.0                                           | (0.02)    |                       | -0.6               | (0.09)    |                       | -0.8                                         | (0.12)    |                       | -0.3                           | (0.68)    |                       |
| <b>&gt;65 years old</b>              |                    |            |                       |                               |           |                       |                      |           |                       |                                                |           |                       |                    |           |                       |                                              |           |                       |                                |           |                       |
| Without comorbidities                | 3.8                | (3.2-4.5)  |                       | 1.0                           | (0.3-1.7) | <.001                 | 3.2                  | (2.0-4.5) | 0.003                 | 1.7                                            | (1.4-1.9) | 0.02                  | 1.3                | (1.0-1.6) | 0.06                  | 1.5                                          | (1.1-1.9) | 0.33                  | 2.1                            | (1.5-2.8) | 0.10                  |
| With comorbidities                   | 2.9                | (2.4-3.4)  |                       | 1.3                           | (0.8-1.8) | <.001                 | 1.8                  | (1.1-2.5) | 0.28                  | 1.1                                            | (0.7-1.5) | 0.11                  | 1.2                | (0.8-1.5) | 0.86                  | 1.6                                          | (1.0-2.2) | 0.19                  | 2.1                            | (1.4-2.8) | 0.30                  |
| Diff <sup>†</sup> ( <i>p</i> -value) | -1.0               | (0.02)     |                       | 0.3                           | (0.47)    |                       | -1.4                 | (0.05)    |                       | -0.6                                           | (0.03)    |                       | -0.1               | (0.65)    |                       | 0.1                                          | (0.84)    |                       | -0.1                           | (0.90)    |                       |

INSPQ: Institut national de santé publique du Québec

**Pre-COVID:** February 1<sup>st</sup> 2018 to March 17<sup>th</sup> 2019; **1<sup>st</sup> wave:** April 21<sup>st</sup> to May 25<sup>th</sup> 2020; **Summer 2020:** July 3<sup>rd</sup> to August 22<sup>nd</sup> 2020; **2<sup>nd</sup> wave:** August 23<sup>rd</sup> 2020 to March 20<sup>th</sup> 2021;

**Holidays:** December 17<sup>th</sup> 2020 to January 8<sup>th</sup> 2021; **3<sup>rd</sup> wave:** March 21<sup>st</sup> to July 4<sup>th</sup> 2021.

<sup>¥</sup>p: p-value of the difference with the preceding period

\* Results for all adults and 18-65-year-olds are adjusted for age

<sup>†</sup> Diff: Difference between individuals with and without comorbidities and p-value of this difference

## B) According to NACI

|                             | Pre-COVID<br>n=792 |            |  | 1 <sup>st</sup> wave<br>n=413 |           |                | Summer 2020<br>n=679 |           |                | 2 <sup>nd</sup> wave before holidays<br>n=1261 |           |                | Holidays<br>n=1197 |           |                | 2 <sup>nd</sup> wave after holidays<br>n=988 |           |                | 3 <sup>rd</sup> wave<br>n=1296 |           |                |
|-----------------------------|--------------------|------------|--|-------------------------------|-----------|----------------|----------------------|-----------|----------------|------------------------------------------------|-----------|----------------|--------------------|-----------|----------------|----------------------------------------------|-----------|----------------|--------------------------------|-----------|----------------|
|                             | mean               | 95% CI     |  | mean                          | 95% CI    | p <sup>‡</sup> | mean                 | 95% CI    | p <sup>‡</sup> | mean                                           | 95% CI    | p <sup>‡</sup> | mean               | 95% CI    | p <sup>‡</sup> | mean                                         | 95% CI    | p <sup>‡</sup> | mean                           | 95% CI    | p <sup>‡</sup> |
| <b>All adults*</b>          |                    |            |  |                               |           |                |                      |           |                |                                                |           |                |                    |           |                |                                              |           |                |                                |           |                |
| Without comorbidities       | 7.9                | (7.1-8.7)  |  | 2.9                           | (2.5-3.4) | <.001          | 4.3                  | (3.8-4.9) | <.001          | 3.7                                            | (3.4-4.0) | 0.06           | 2.8                | (2.6-3.1) | <.001          | 3.3                                          | (3.0-3.6) | 0.01           | 4.4                            | (4.0-4.8) | <.001          |
| With comorbidities          | 5.1                | (4.1-6.1)  |  | 2.7                           | (2.2-3.2) | <.001          | 3.1                  | (2.4-3.7) | 0.41           | 2.8                                            | (2.3-3.2) | 0.46           | 3.0                | (2.5-3.4) | 0.55           | 2.8                                          | (2.1-3.5) | 0.75           | 4.1                            | (3.0-5.1) | 0.05           |
| Diff <sup>†</sup> (p-value) | -2.8               | (<.001)    |  | -0.2                          | (0.52)    |                | -1.3                 | (0.004)   |                | -0.9                                           | (0.001)   |                | 0.1                | (0.61)    |                | -0.5                                         | (0.19)    |                | -0.4                           | (0.54)    |                |
| <b>18-65 years old*</b>     |                    |            |  |                               |           |                |                      |           |                |                                                |           |                |                    |           |                |                                              |           |                |                                |           |                |
| Without comorbidities       | 9.1                | (8.1-10.1) |  | 3.4                           | (2.7-4.0) | <.001          | 4.5                  | (3.8-5.1) | 0.02           | 4.3                                            | (3.9-4.8) | 0.72           | 3.1                | (2.8-3.5) | <.001          | 3.8                                          | (3.3-4.2) | 0.03           | 5.1                            | (4.6-5.5) | <.001          |
| With comorbidities          | 5.9                | (3.8-8.1)  |  | 1.2                           | (0.9-1.6) | <.001          | 3.4                  | (2.0-4.9) | 0.003          | 2.6                                            | (1.9-3.4) | 0.33           | 2.8                | (2.0-3.7) | 0.75           | 2.0                                          | (1.5-2.6) | 0.12           | 5.3                            | (2.6-8.0) | 0.02           |
| Diff <sup>†</sup> (p-value) | -3.2               | (0.008)    |  | -2.1                          | (<.001)   |                | -1.0                 | (0.19)    |                | -1.7                                           | (<.001)   |                | -0.3               | (0.50)    |                | -1.7                                         | (<.001)   |                | 0.3                            | (0.85)    |                |
| <b>&gt;65 years old</b>     |                    |            |  |                               |           |                |                      |           |                |                                                |           |                |                    |           |                |                                              |           |                |                                |           |                |
| Without comorbidities       | 3.7                | (3.1-4.3)  |  | 1.2                           | (0.7-1.8) | <.001          | 3.0                  | (2.0-4.0) | 0.003          | 1.5                                            | (1.3-1.8) | 0.007          | 1.3                | (1.0-1.5) | 0.16           | 1.6                                          | (1.2-2.0) | 0.22           | 2.2                            | (1.7-2.8) | 0.06           |
| With comorbidities          | 3.0                | (2.3-3.6)  |  | 1.0                           | (0.4-1.7) | <.001          | 1.4                  | (0.5-2.3) | 0.52           | 1.3                                            | (0.6-2.0) | 0.86           | 1.1                | (0.7-1.5) | 0.62           | 1.4                                          | (1.0-1.9) | 0.32           | 1.7                            | (1.0-2.4) | 0.45           |
| Diff <sup>†</sup> (p-value) | -0.7               | (0.10)     |  | -0.2                          | (0.69)    |                | -1.6                 | (0.02)    |                | -0.2                                           | (0.53)    |                | -0.2               | (0.52)    |                | -0.2                                         | (0.62)    |                | -0.5                           | (0.30)    |                |

NACI: National Advisory Committee on Immunization

**Pre-COVID:** February 1<sup>st</sup> 2018 to March 17<sup>th</sup> 2019; **1<sup>st</sup> wave:** April 21<sup>st</sup> to May 25<sup>th</sup> 2020; **Summer 2020:** July 3<sup>rd</sup> to August 22<sup>nd</sup> 2020; **2<sup>nd</sup> wave:** August 23<sup>rd</sup> 2020 to March 20<sup>th</sup> 2021;

**Holidays:** December 17<sup>th</sup> 2020 to January 8<sup>th</sup> 2021; **3<sup>rd</sup> wave:** March 21<sup>st</sup> to July 4<sup>th</sup> 2021.

<sup>‡</sup>p: p-value of the difference with the preceding period

\* Results for all adults and 18-65-year-olds are adjusted for age

<sup>†</sup> Diff: Difference between individuals with and without comorbidities and p-value of this difference

**Table S8. Vaccination coverage with one dose of individuals with and without active physical comorbidities in the third wave**

|                                      | 18-25 yrs old<br>n=199 |             | 26-45 yrs old<br>n=492 |             | 46-65 yrs old<br>n=511 |             | >65 yrs old<br>n=192 |             |
|--------------------------------------|------------------------|-------------|------------------------|-------------|------------------------|-------------|----------------------|-------------|
|                                      | mean (%)               | 95% CI      | mean (%)               | 95% CI      | mean (%)               | 95% CI      | mean (%)             | 95% CI      |
| Without comorbidities                | 44.0                   | (36.6-51.4) | 52.0                   | (46.7-57.1) | 67.6                   | (62.9-72.3) | 89.1                 | (80.1-98.0) |
| With comorbidities                   | 25.4                   | (3.8-47.0)  | 57.9                   | (47.7-68.2) | 66.5                   | (57.7-75.2) | 93.8                 | (89.0-98.5) |
| Diff <sup>†</sup> ( <i>p-value</i> ) | -18.6                  | (0.11)      | 6.0                    | (0.31)      | -1.1                   | (0.83)      | 4.7                  | (0.36)      |

**Third wave:** March 21<sup>st</sup> to July 4<sup>th</sup> 2021.

<sup>†</sup> Diff: Difference between individuals with and without comorbidities and p-value of this difference

**Table S9. Recommended Quebec priority groups for vaccination against COVID-19 [14]**

| <b>Priority order</b> | <b>Groups</b>                                                                    |
|-----------------------|----------------------------------------------------------------------------------|
| <b>1</b>              | Elderly people living in long-term care facilities (nursing homes, CHSLD)        |
| <b>2</b>              | Health care workers                                                              |
| <b>3</b>              | Elderly people living in retirement homes                                        |
| <b>4</b>              | Isolated and remote communities                                                  |
| <b>5</b>              | Adults aged over 80 years                                                        |
| <b>6</b>              | Adults aged 70 to 79 years                                                       |
| <b>7</b>              | Adults aged 60 to 69 years                                                       |
| <b>8</b>              | Adults aged under 60 years with comorbidities at risk of COVID-19 complications* |
| <b>9</b>              | Adults aged under 60 years without comorbidities working in essential services   |
| <b>10</b>             | General adult population                                                         |
| <b>11</b>             | Children                                                                         |

\* In practice, only individuals aged under 60 years with conditions at very high risk of COVID-19 complications (hospitalised patients with comorbidities or outpatients with severe immunosuppressive conditions) were invited to be vaccinated before other individuals in their age group [48].

**Table S10. Mean total number of social contacts in the third wave of individuals with and without active physical comorbidities according to vaccination status with one dose**

|                                                 | 18-25 yrs old<br>n=199 |      |            | 26-45 yrs old<br>n=492 |      |           | 46-65 yrs old<br>n=511 |      |           | >65 yrs old<br>n=192 |      |           |
|-------------------------------------------------|------------------------|------|------------|------------------------|------|-----------|------------------------|------|-----------|----------------------|------|-----------|
|                                                 | n                      | mean | 95% CI     | n                      | mean | 95% CI    | n                      | mean | 95% CI    | n                    | mean | 95% CI    |
| <b>Not vaccinated</b>                           |                        |      |            |                        |      |           |                        |      |           |                      |      |           |
| Without comorbidities                           | 101                    | 4.9  | (2.8-7.0)  | 189                    | 4.6  | (3.3-5.9) | 129                    | 3.3  | (1.8-4.7) | 11                   | 2.8  | (0.9-4.6) |
| With comorbidities                              | 14                     | 10.7 | (4.9-16.5) | 41                     | 2.9  | (1.7-4.1) | 40                     | 1.7  | (0.0-3.8) | 7                    | 2.0  | (1.2-2.8) |
| <b>Vaccinated</b>                               |                        |      |            |                        |      |           |                        |      |           |                      |      |           |
| Without comorbidities                           | 80                     | 7.5  | (4.6-10.5) | 206                    | 6.9  | (5.4-8.4) | 264                    | 4.8  | (3.8-5.9) | 108                  | 2.1  | (1.5-2.7) |
| With comorbidities                              | 4                      | 6.0  | (0.7-11.2) | 56                     | 5.9  | (3.7-8.0) | 78                     | 5.2  | (2.9-7.5) | 66                   | 2.1  | (1.4-2.7) |
| <b>Between group differences</b>                |                        |      |            |                        |      |           |                        |      |           |                      |      |           |
| <b>Not vaccinated:</b>                          |                        |      |            |                        |      |           |                        |      |           |                      |      |           |
| with – without comorbidities ( <i>p-value</i> ) |                        | 5.8  | (0.05)     |                        | -1.7 | (0.03)    |                        | -1.6 | (0.10)    |                      | -0.7 | (0.46)    |
| <b>Vaccinated:</b>                              |                        |      |            |                        |      |           |                        |      |           |                      |      |           |
| with – without comorbidities ( <i>p-value</i> ) |                        | -1.6 | (0.60)     |                        | -1.0 | (0.42)    |                        | 0.3  | (0.78)    |                      | -0.0 | (0.98)    |
| <b>Without comorbidities:</b>                   |                        |      |            |                        |      |           |                        |      |           |                      |      |           |
| vaccinated – not vaccinated ( <i>p-value</i> )  |                        | 2.6  | (0.21)     |                        | 2.2  | (0.05)    |                        | 1.6  | (0.13)    |                      | -0.7 | (0.47)    |
| <b>With comorbidities:</b>                      |                        |      |            |                        |      |           |                        |      |           |                      |      |           |
| vaccinated – not vaccinated ( <i>p-value</i> )  |                        | -4.7 | (0.25)     |                        | 3.0  | (0.02)    |                        | 3.5  | (0.06)    |                      | 0.1  | (0.92)    |

**Third wave:** March 21<sup>st</sup> to July 4<sup>th</sup> 2021.

Results are adjusted for the time periods (March, April, May, June-July).



**Figure S1. Distribution of participants according to classifications of comorbidities**

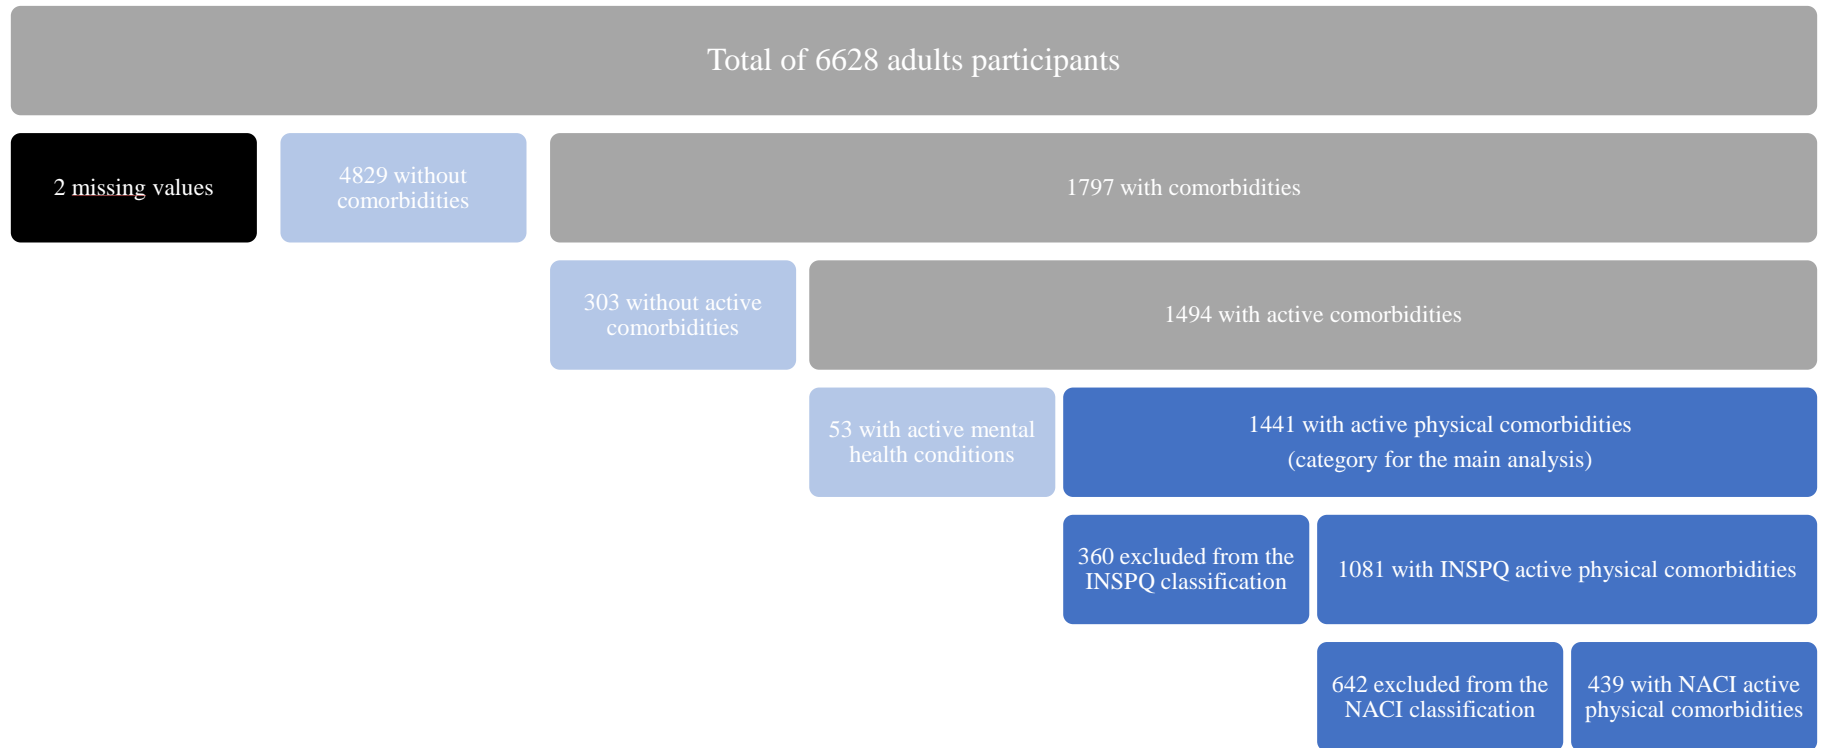

INSPQ: Institut national de santé publique du Québec  
NACI: National Advisory Committee on Immunization

**Figure S2. Time trends in vaccination coverage with one dose of individuals with and without active physical comorbidities in the third wave**

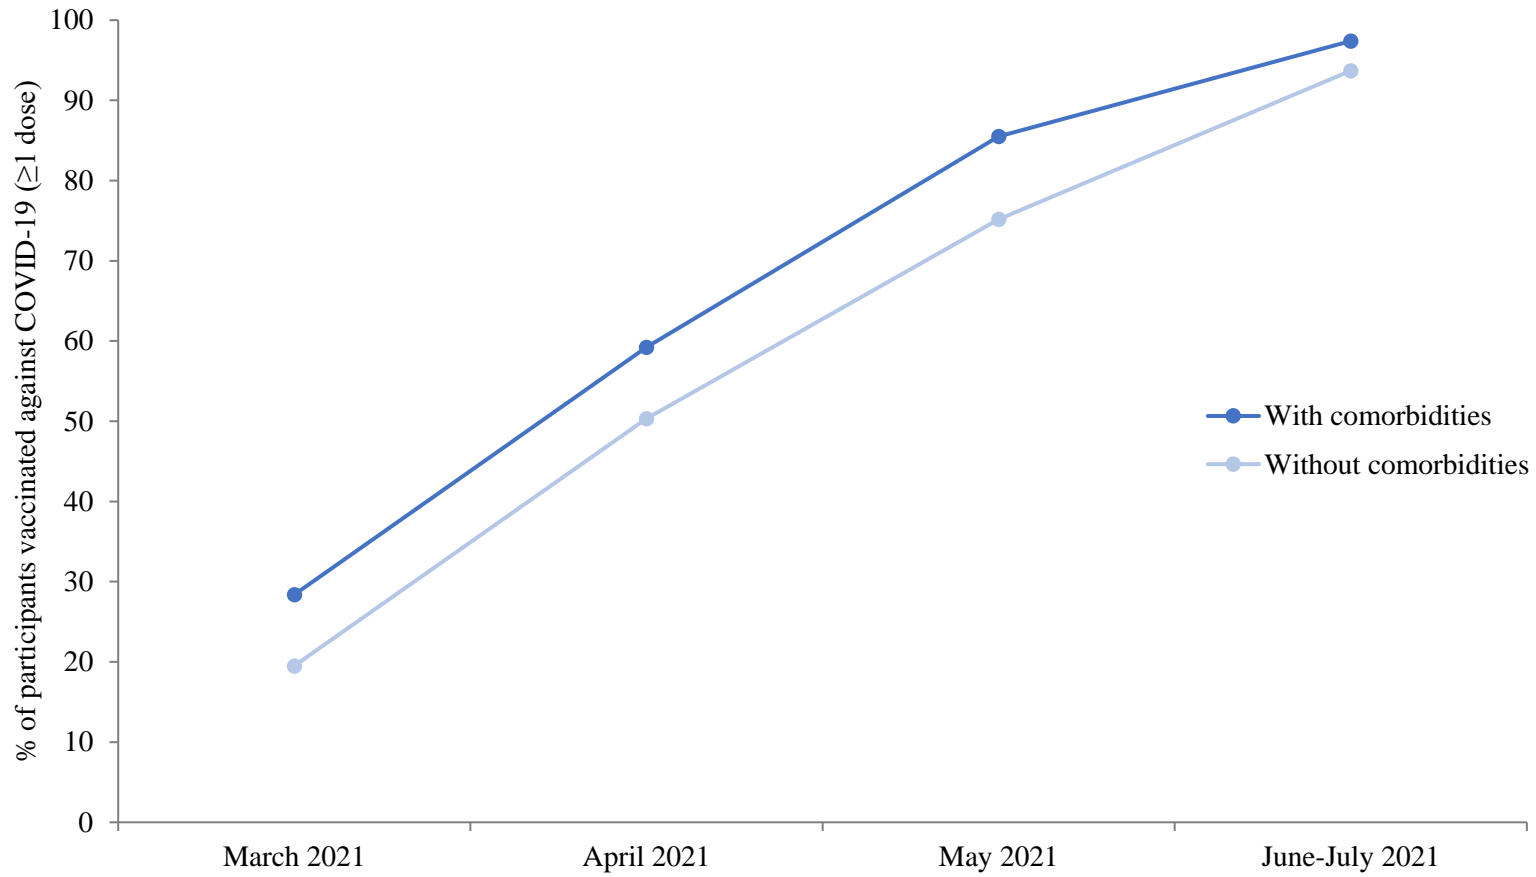

**Third wave:** March 21<sup>st</sup> to July 4<sup>th</sup> 2021.

**Example of questions S1. Questions on health conditions**

**27. A) Which of the following long-term conditions do you have or have had?  
*[check all that apply]***

| Health conditions                                                                                                                                                 |                                                                                                  |
|-------------------------------------------------------------------------------------------------------------------------------------------------------------------|--------------------------------------------------------------------------------------------------|
| <input type="checkbox"/> Chronic lung disease (e.g., asthma, chronic bronchitis, emphysema, chronic obstructive pulmonary disease (COPD), cystic fibrosis)        | <input type="checkbox"/> Chronic renal disease and/or dialysis                                   |
| <input type="checkbox"/> Diabetes                                                                                                                                 | <input type="checkbox"/> Asplenia or hyposplenia (absent or defective spleen)                    |
| <input type="checkbox"/> Chronic heart disease                                                                                                                    | <input type="checkbox"/> Neurologic problem (e.g., Guillain-Barré syndrome, multiple sclerosis)  |
| <input type="checkbox"/> Chronic liver disease                                                                                                                    | <input type="checkbox"/> Hematologic problem (e.g., anemia, hemoglobinopathy, bleeding problems) |
| <input type="checkbox"/> Chronic inflammatory disease (e.g., lupus erythematosus, rheumatoid arthritis, psoriasis, eczema, Crohn's disease, ulcerative colitis)   | <input type="checkbox"/> Alzheimer disease or any other dementia                                 |
| <input type="checkbox"/> Cancer                                                                                                                                   | <input type="checkbox"/> Another long-term health condition, specify:<br><hr/>                   |
| <input type="checkbox"/> Immunosuppressing condition (e.g., organ transplantation, HIV-infection, cancer chemotherapy, radiotherapy, congenital immunodeficiency) |                                                                                                  |

**27. B) For which of the following conditions have you had any symptoms or taken any medicine in the past 12 months ?**

| Health conditions                                                                                                                                                 |                                                                                                  |
|-------------------------------------------------------------------------------------------------------------------------------------------------------------------|--------------------------------------------------------------------------------------------------|
| <input type="checkbox"/> Chronic lung disease (e.g., asthma, chronic bronchitis, emphysema, chronic obstructive pulmonary disease (COPD), cystic fibrosis)        | <input type="checkbox"/> Chronic renal disease and/or dialysis                                   |
| <input type="checkbox"/> Diabetes                                                                                                                                 | <input type="checkbox"/> Asplenia or hyposplenia (absent or defective spleen)                    |
| <input type="checkbox"/> Chronic heart disease                                                                                                                    | <input type="checkbox"/> Neurologic problem (e.g., Guillain-Barré syndrome, multiple sclerosis)  |
| <input type="checkbox"/> Chronic liver disease                                                                                                                    | <input type="checkbox"/> Hematologic problem (e.g., anemia, hemoglobinopathy, bleeding problems) |
| <input type="checkbox"/> Chronic inflammatory disease (e.g., lupus erythematosus, rheumatoid arthritis, psoriasis, eczema, Crohn's disease, ulcerative colitis)   | <input type="checkbox"/> Alzheimer disease or any other dementia                                 |
| <input type="checkbox"/> Cancer                                                                                                                                   | <input type="checkbox"/> Another long-term health condition, specify:<br>_____                   |
| <input type="checkbox"/> Immunosuppressing condition (e.g., organ transplantation, HIV-infection, cancer chemotherapy, radiotherapy, congenital immunodeficiency) | <input type="checkbox"/> No symptoms and no medicine for these conditions in the past 12 months  |
